# Protective and Detrimental Effects of Sodium Sulfide and Hydrogen Sulfide in Murine Ventilator-induced Lung Injury

Roland C. Francis, M.D.,\* Katerina Vaporidi, M.D., Ph.D.,† Kenneth D. Bloch, M.D.,‡ Fumito Ichinose, M.D., Ph.D.,§ Warren M. Zapol, M.D.||

## ABSTRACT

**Background:** The antiinflammatory effects of hydrogen sulfide ( $H_2S$ ) and sodium sulfide ( $Na_2S$ ) treatment may prevent acute lung injury induced by high tidal volume ( $HV_T$ ) ventilation. However, lung protection may be limited by direct pulmonary toxicity associated with  $H_2S$  inhalation. Therefore, the authors tested whether the inhalation of  $H_2S$  or intravascular  $Na_2S$  treatment can protect against ventilator-induced lung injury in mice.

\* Research Fellow, Anesthesia Center for Critical Care Research, Department of Anesthesia, Critical Care and Pain Medicine, Massachusetts General Hospital and Harvard Medical School, Boston, Massachusetts, and Staff Anesthesiologist, Klinik für Anästhesiologie m.S. operative Intensivmedizin, Charité–Universitätsmedizin Berlin, Campus Virchow-Klinikum und Campus Charité Mitte, Berlin, Germany. † Research Fellow, Anesthesia Center for Critical Care Research, Department of Anesthesia, Critical Care and Pain Medicine, Massachusetts General Hospital and Harvard Medical School, and Staff Intensivist, Instructor, Department of Intensive Care Medicine, University Hospital of Heraklion, Medical School, University of Crete, Heraklion, Crete, Greece. ‡ William T. G. Morton Professor of Anesthesia, § Associate Professor of Anesthesia, || Reginald Jenney Professor of Anesthesia, Anesthesia Center for Critical Care Research, Department of Anesthesia, Critical Care and Pain Medicine, Massachusetts General Hospital and Harvard Medical School.

Received from the Anesthesia Center for Critical Care Research, Department of Anesthesia, Critical Care and Pain Medicine, Massachusetts General Hospital and Harvard Medical School, Boston, Massachusetts. Submitted for publication December 18, 2010. Accepted for publication July 20, 2011. Supported by fellowship grant FR 2555/3-1 (to Dr. Francis) from the German Research Foundation (Deutsche Forschungsgemeinschaft, Bonn, Germany); royalties from Ikaria Inc., Hampton, New Jersey, and Linde Corp, Murray Hill, New Jersey (to Dr. Zapol); and grants HL074352 (to Dr. Bloch) and HL101930 (to Dr. Ichinose) from the United States Public Health Service, Washington, D.C.

Address correspondence to Dr. Zapol: Department of Anesthesia, Critical Care, and Pain Medicine, Massachusetts General Hospital, Harvard Medical School, 55 Fruit Street, Boston, Massachusetts 02114. wzapol@partners.org. This article may be accessed for personal use at no charge through the Journal Web site, [www.anesthesiology.org](http://www.anesthesiology.org).

Copyright © 2011, the American Society of Anesthesiologists, Inc. Lippincott Williams & Wilkins. Anesthesiology 2011; 115:1012–21

## What We Already Know about This Topic

- Sulfides such as sodium sulfide and hydrogen sulfide have both protective and detrimental effects on cells
- High tidal volume ventilation can produce acute lung injury

## What This Article Tells Us That Is New

- Inhalation of hydrogen sulfide has no beneficial effects on ventilator-induced lung injury in mice
- Intravascular administration of sodium sulfide attenuates the development of ventilator-induced lung injury through antioxidative signaling pathways

**Methods:** Anesthetized mice continuously inhaled 0, 1, 5, or 60 ppm  $H_2S$  or received a single bolus infusion of  $Na_2S$  (0.55 mg/kg) or vehicle and were then subjected to  $HV_T$  (40 ml/kg) ventilation lasting 4 h ( $n = 4–8$  per group).

**Results:**  $HV_T$  ventilation increased the concentrations of protein and interleukin-6 in bronchoalveolar lavage fluid, contributing to reduced respiratory compliance and impaired arterial oxygenation, and caused death from lung injury and pulmonary edema. Inhalation of 1 or 5 ppm  $H_2S$  during  $HV_T$  ventilation did not alter lung injury, but inhalation of 60 ppm  $H_2S$  accelerated the development of ventilator-induced lung injury and enhanced the pulmonary expression of the chemoattractant CXCL-2 and the leukocyte adhesion molecules CD11b and L-selectin. In contrast, pretreatment with  $Na_2S$  attenuated the expression of CXCL-2

◇ This article is featured in “This Month in Anesthesiology.” Please see this issue of ANESTHESIOLOGY, page 9A.

◆ This article is accompanied by an Editorial View. Please see: Aslami H, Schultz MJ, Juffermans NP: Hydrogen sulfide: A hot molecule. ANESTHESIOLOGY 2011; 115:921–2.

⊕ Supplemental digital content is available for this article. Direct URL citations appear in the printed text and are available in both the HTML and PDF versions of this article. Links to the digital files are provided in the HTML text of this article on the Journal's Web site ([www.anesthesiology.org](http://www.anesthesiology.org)).

and CD11b during HV<sub>T</sub> ventilation and reduced pulmonary edema. Moreover, Na<sub>2</sub>S enhanced the pulmonary expression of Nrf2-dependent antioxidant genes (NQO1, GPX2, and GST-A4) and prevented oxidative stress-induced depletion of glutathione in lung tissue.

**Conclusions:** The data suggest that systemic intravascular treatment with Na<sub>2</sub>S represents a novel therapeutic strategy to prevent both ventilator-induced lung injury and pulmonary glutathione depletion by activating Nrf2-dependent antioxidant gene transcription.

**M**ECHANICAL ventilation can be life-saving in acute respiratory failure but may contribute to lung injury because of its side effects.<sup>1,2</sup> Cyclic lung stretch during mechanical ventilation induces tissue disruption and activates proinflammatory pathways, promoting the formation of pulmonary edema and neutrophil infiltration.<sup>3</sup> In addition, cyclic lung stretch is associated with generation of reactive oxygen species and production of redox imbalance in the lung.<sup>4–6</sup> Together, these events may initiate and perpetuate oxidative stress and local and systemic inflammatory responses, enhance lung injury, and lead to multiorgan failure and mortality.<sup>7–9</sup> Developing novel therapies targeted at oxidative stress and inflammation in ventilator-induced lung injury (VILI) could be useful clinically.

Hydrogen sulfide (H<sub>2</sub>S) is an endogenous gaseous transmitter.<sup>10</sup> The antiinflammatory and antiapoptotic effects of H<sub>2</sub>S and other sulfides, such as sodium hydrogen sulfide or disodium sulfide (Na<sub>2</sub>S), have been studied in various animal models of inflammation (reviewed in Baumgart *et al.*<sup>11</sup>) and oxidative stress.<sup>12,13</sup> In particular, Calvert *et al.* reported that Na<sub>2</sub>S protects against cardiac ischemia or reperfusion injury by up-regulating Nrf2-dependent antioxidant and detoxification proteins.<sup>14</sup> Nrf2 (*i.e.*, nuclear factor E2-related factor 2) is a key transcription factor that regulates antioxidant genes as an adaptive response to oxidative stress or pharmacologic stimuli. Downstream targets of Nrf2 include direct antioxidant proteins (such as glutathione peroxidase, NAD(P)H oxidoreductase, *etc.*), thiol-metabolism associated detoxifying enzymes (such as glutathione-S-transferase, glutamate–cysteine ligase, thioredoxin, *etc.*), stress-response genes (heme oxygenase, heat-shock proteins, ferritin, *etc.*), and others. In a murine model of VILI, it has been shown that Nrf2-dependent antioxidant genes play a key protective role in reducing oxidative stress.<sup>5</sup> Whether or not H<sub>2</sub>S can protect against VILI by modulating the expression of Nrf2-dependent antioxidant genes has not been reported.

Inhalation of H<sub>2</sub>S gas is known to cause airway mucosa irritation and cytotoxicity,<sup>10,15</sup> has been reported to exert proinflammatory effects in various models (reviewed in Szabo<sup>10</sup> and Baumgart *et al.*<sup>11</sup>), and traditionally has been considered a health hazard. On the other hand, Faller *et al.* recently showed that inhaled H<sub>2</sub>S at 80 ppm prevents lung injury in mice ventilated with a tidal volume of 12 ml/kg (plateau pressure 10–13 cm H<sub>2</sub>O, *i.e.*, moderate stretch).<sup>16</sup> Nonetheless, molecular mechanisms responsible for the protective

effects of H<sub>2</sub>S inhalation against VILI are not completely understood. In addition, it remains uncertain whether inhaled H<sub>2</sub>S is protective or deleterious during mechanical ventilation that produces increased lung stretch, such as in patients with acute respiratory distress syndrome.

To elucidate the role of H<sub>2</sub>S in VILI, we examined the effect of inhaled H<sub>2</sub>S in a model of lung injury induced by high tidal volume (HV<sub>T</sub>) ventilation. We found that H<sub>2</sub>S gas promotes VILI and enhances the pulmonary expression of leukocyte adhesion and chemoattractant molecules. Subsequently, we hypothesized that intravascular administration of Na<sub>2</sub>S, avoiding direct exposure of the lung to H<sub>2</sub>S gas, could provide better protection against VILI than could inhaled H<sub>2</sub>S. We report that intravascular Na<sub>2</sub>S both attenuates the pulmonary expression of chemoattractant and leukocyte adhesion molecules and enhances Nrf2-dependent expression of antioxidant genes, thereby attenuating VILI from HV<sub>T</sub> ventilation.

## Materials and Methods

This study was approved by the Institutional Animal Care and Use Committee (Subcommittee on Research Animal Care, Massachusetts General Hospital, Boston, Massachusetts), and conforms to the revised Guide for the Care and Use of Laboratory Animals.

### Mouse Model of VILI

Male C57BL/6 mice (23.3 ± 1.0 g, mean ± SD) were subjected to HV<sub>T</sub> ventilation as described previously<sup>6</sup> with minor modifications of inspired oxygen fraction (F<sub>IO2</sub>) positive end-expiratory pressure, and alveolar recruitment. Briefly, after anesthesia was induced and tracheostomy performed, mice were ventilated in a volume-controlled mode (Inspira; Harvard Apparatus, Boston, MA) at a tidal volume (V<sub>T</sub>) of 10 ml/kg, respiratory rate of 90 breaths/min, positive end-expiratory pressure of 2 cm H<sub>2</sub>O, and F<sub>IO2</sub> 0.4 for 1 h (baseline ventilation). Immediately after the tracheostomy and after the initiation of ventilation, a carotid catheter was inserted for blood pressure monitoring, continuous infusion of anesthetics, and blood sampling. After 1 h of baseline ventilation, the ventilator settings were switched to an HV<sub>T</sub> of 40 ml/kg, positive end-expiratory pressure of 1 cm H<sub>2</sub>O, and respiratory rate of 60 breaths/min, and mice were ventilated for a maximum duration of 240 min of HV<sub>T</sub> ventilation. The F<sub>IO2</sub> (0.4) was not changed. Because a plateau pressure exceeding 30 cm H<sub>2</sub>O is associated with increased mortality<sup>1</sup> and commonly is used as a trigger for initiating rescue therapies in patients with acute respiratory distress syndrome, we aimed for plateau pressures of more than 30 cm H<sub>2</sub>O to induce VILI in mice. In this model using normal lungs, a tidal volume of 40 ml/kg was necessary to increase plateau pressure above 30 cm H<sub>2</sub>O, resulting in a peak pressure of ~35 cm H<sub>2</sub>O.

Alveolar recruitment maneuvers were performed every 30 min during the baseline period and every 60 min during HV<sub>T</sub> ventilation. Body temperature was maintained at 37°C with a heating pad. See Materials and Methods in Supplemental

Digital Content 1, <http://links.lww.com/ALN/A775>, which provides the detailed methodology of the mouse model of VILI.

### Experimental Groups

After 30 min of baseline ventilation (*i.e.*, 30 min *before* the onset of injurious HV<sub>T</sub> ventilation), mice were treated with either inhaled H<sub>2</sub>S or intravascular Na<sub>2</sub>S as follows: H<sub>2</sub>S gas (hydrogen sulfide 100 ppm, balance nitrogen, MedTech-Gases, Medford, MA) was diluted and added continuously to the inhaled gas mixture (FIO<sub>2</sub> = 0.4) at a concentration of 0, 1, 5, or 60 ppm (*n* = 6 each) until the end of the study. Alternatively, mice received a single intraarterial bolus injection of Na<sub>2</sub>S (sodium sulfide nonahydrate, Sigma-Aldrich, St. Louis, MO; 0.55 mg/kg in 5.5 ml vehicle/kg body weight, *n* = 8) or vehicle alone (Dulbecco's phosphate buffered saline, Sigma-Aldrich; 5.5 ml/kg body weight, *n* = 8).

The animals were killed after 240 min of HV<sub>T</sub> ventilation or when their mean arterial pressure decreased to less than 60 mmHg for more than 5 min. Immediately after the animals were killed, respiratory mechanics were assessed and arterial blood was collected. Bronchoalveolar lavage (BAL) and the collection of lung tissues were performed as described in Supplemental Digital Content 1, <http://links.lww.com/ALN/A775>.

Control mice not subjected to HV<sub>T</sub> ventilation (*n* = 4) were killed after 5 min of baseline ventilation.

### Evaluation of Respiratory Mechanics and Blood Gas Analysis

We measured V<sub>T</sub>, peak inspiratory airway pressure (PIP), inspiratory capacity, compliance of the respiratory system, pressure-volume curves, and arterial blood gas tensions, as described in Supplemental Digital Content 1, <http://links.lww.com/ALN/A775>.

### Evaluation of Pulmonary Edema, Inflammation, and Histologic Changes

Protein concentration in BAL fluid was measured (Bradford assay; Sigma-Aldrich) to assess pulmonary edema formation. Lung inflammation was determined by measuring interleukin-6 (IL-6 enzyme-linked immunosorbent assay; R&D Systems, Minneapolis, MN) and leukocyte concentrations in BAL fluid.

Paraffin-embedded 6- $\mu$ m lung sections were stained with hematoxylin and eosin or reacted with an antimouse neutrophil antibody (Cedarlane Laboratories, Burlington, Ontario, Canada) to evaluate histopathologic changes and neutrophil infiltration (see Materials and Methods in Supplemental Digital Content 1, <http://links.lww.com/ALN/A775>, which provides the detailed methodology of staining tissue sections).

### Evaluation of Oxidative Stress and Pulmonary Gene Expression

Total, reduced (GSH) and oxidized (GSSG), glutathione concentrations in lung tissue were measured using an enzymatic assay (Cayman Chemical, Ann Arbor, MI).

Quantitative real-time polymerase chain reaction was used to determine the pulmonary expression of the neutrophil chemoattractant cytokine CXCL-2 (*i.e.*, macrophage inflammatory protein 2), the leukocyte adhesion molecules CD11b (*i.e.*, integrin  $\alpha$  M), and L-selectin, as well as the following Nrf2-dependent antioxidant genes: NAD(P)H: quinone oxidoreductase (NQO1), glutathione-S-transferase A4 (GST-A4), and glutathione peroxidase 2 (GPX2) (see Materials and Methods in Supplemental Digital Content 1, <http://links.lww.com/ALN/A775>, which provides the detailed methodology of polymerase chain reaction).

### Statistical Analysis

Animals subjected to HV<sub>T</sub> ventilation *without* H<sub>2</sub>S (0 ppm) were compared with H<sub>2</sub>S-treated animals (60 ppm) subjected to HV<sub>T</sub> ventilation and with animals not subjected to HV<sub>T</sub> ventilation (controls) using ANOVA and Bonferroni multiple comparison tests (two comparisons: controls *vs.* 0 ppm H<sub>2</sub>S; 0 *vs.* 60 ppm H<sub>2</sub>S). Na<sub>2</sub>S-treated animals subjected to HV<sub>T</sub> ventilation were compared with vehicle-injected animals using Student unpaired *t* test (between-group comparison). Survival curves were compared with the log-rank Mantel-Cox test. Compliance of the respiratory system and PIP values at the beginning (1 h of HV<sub>T</sub>) and end of HV<sub>T</sub> ventilation were compared with the Student paired *t* test (within-group comparison). All tests were two-tailed and were performed with GraphPad Prism® version 5.01 for Windows (GraphPad Software, San Diego, CA). Data are expressed as mean  $\pm$  SEM, unless indicated otherwise.

## Results

### Duration of HV<sub>T</sub> Ventilation in Mice Treated with and without H<sub>2</sub>S or Na<sub>2</sub>S

Mice breathing 40% oxygen without added H<sub>2</sub>S died of acute lung injury or fulfilled the criteria for being killed after 224 min (median) of HV<sub>T</sub> ventilation (fig. 1). That is similar to the median survival time of mice ventilated with 1 ppm (236 min) or 5 ppm (215 min) of inhaled H<sub>2</sub>S. In contrast, the median survival time during HV<sub>T</sub> ventilation was shorter in mice breathing 60 ppm H<sub>2</sub>S (166 min; *P* = 0.0016 *vs.* 0 ppm H<sub>2</sub>S). The median survival time in vehicle-treated animals was 231 min. Remarkably, all Na<sub>2</sub>S-treated animals were alive at the end of the experiment (240 min of HV<sub>T</sub> ventilation) and were then killed.

### Effect of Inhaled H<sub>2</sub>S on Respiratory Mechanics during HV<sub>T</sub> Ventilation

Ventilation with a tidal volume of 40 ml/kg resulted in a PIP of 33–35 cm H<sub>2</sub>O in all groups during the first hour of HV<sub>T</sub>

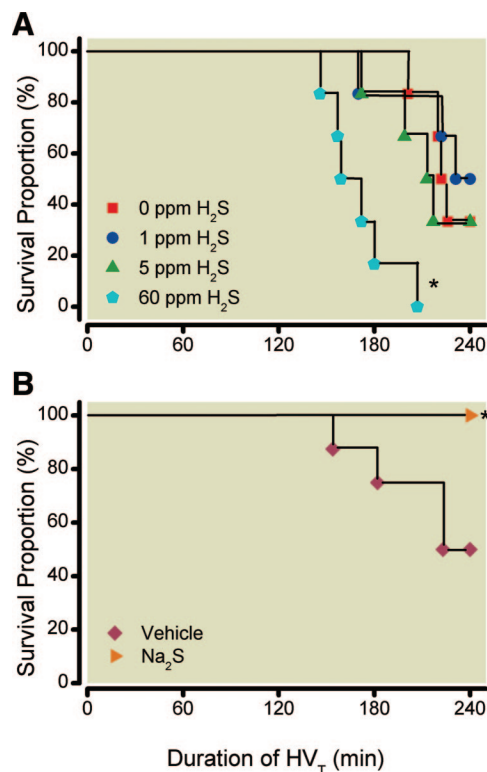

**Fig. 1.** Survival of mice subjected to high tidal volume (HV<sub>T</sub>) ventilation (40 ml/kg) in the presence and absence of various concentrations of inhaled hydrogen sulfide (H<sub>2</sub>S) (n = 6 for each concentration) (A) or after intravascular administration of sodium sulfide (Na<sub>2</sub>S) (n = 8) (B). Mice were killed when their mean arterial pressure decreased to less than 60 mmHg (for more than 5 min) or after a maximum duration of 240 min of HV<sub>T</sub> ventilation. \* *P* = 0.0016 for 0 versus 60 ppm H<sub>2</sub>S and *P* = 0.0256 for vehicle versus Na<sub>2</sub>S.

ventilation. In mice breathing 40% oxygen without added H<sub>2</sub>S, HV<sub>T</sub> ventilation induced a gradual increase of PIP to 43 cm H<sub>2</sub>O by the end of the experiment. A comparable increase in PIP was observed in mice ventilated with 1, 5, or 60 ppm H<sub>2</sub>S (table 1). This increased PIP was associated

**Table 1.** Respiratory Mechanics

|                               | Peak Inspiratory Pressure<br>(cm H <sub>2</sub> O) |                        | Respiratory Compliance<br>(μl/cm H <sub>2</sub> O) |                        |
|-------------------------------|----------------------------------------------------|------------------------|----------------------------------------------------|------------------------|
|                               | 1 h HV <sub>T</sub>                                | End of HV <sub>T</sub> | 1 h HV <sub>T</sub>                                | End of HV <sub>T</sub> |
| <b>Inhalation</b>             |                                                    |                        |                                                    |                        |
| 0 ppm H <sub>2</sub> S        | 35 ± 0.3                                           | 43 ± 0.1*              | 38 ± 1.1                                           | 22 ± 1.6               |
| 1 ppm H <sub>2</sub> S        | 34 ± 0.4                                           | 42 ± 0.7*              | 40 ± 1.3                                           | 20 ± 2.2*              |
| 5 ppm H <sub>2</sub> S        | 35 ± 0.6                                           | 42 ± 0.1*              | 40 ± 0.6                                           | 18 ± 1.3*              |
| 60 ppm H <sub>2</sub> S       | 33 ± 0.5                                           | 42 ± 0.2*              | 39 ± 0.9                                           | 18 ± 0.7*              |
| <b>Intravascular infusion</b> |                                                    |                        |                                                    |                        |
| Vehicle                       | 34 ± 0.2                                           | 43 ± 0.3*              | 40 ± 0.4                                           | 24 ± 1.4*              |
| Na <sub>2</sub> S, 0.55 mg/kg | 35 ± 0.2                                           | 39 ± 0.6†              | 39 ± 0.6                                           | 34 ± 2.3†              |

Respiratory mechanics were measured in mice subjected to high tidal volume (HV<sub>T</sub>) ventilation. Values represent mean ± SEM after 60 min (1 h HV<sub>T</sub>) and at the end of HV<sub>T</sub> ventilation (maximum 240 min).

\* *P* < 0.05 vs. 1 h HV<sub>T</sub>. † *P* < 0.05 vs. vehicle.

H<sub>2</sub>S = hydrogen sulfide; Na<sub>2</sub>S = sodium sulfide.

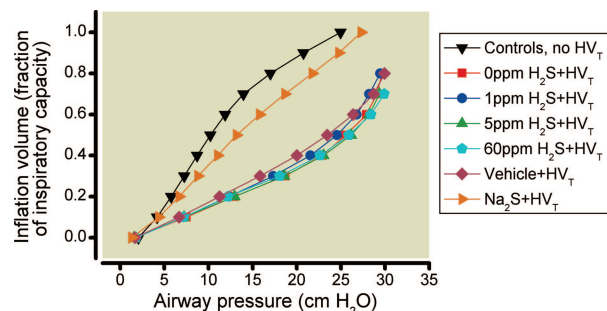

**Fig. 2.** Compliance of the respiratory system was assessed in mice subjected to high tidal volume (HV<sub>T</sub>) ventilation in the presence and absence of various concentrations of inhaled hydrogen sulfide (H<sub>2</sub>S) (n = 6 for each concentration) or after HV<sub>T</sub> ventilation in mice pretreated with intravascular sodium sulfide (Na<sub>2</sub>S) (n = 8) or vehicle (n = 8). Pressure-volume curves were plotted as the inflation volume (expressed as a fraction of inspiratory capacity) as a function of airway pressure and were compared with control mice not subjected to HV<sub>T</sub> ventilation (n = 4). Deterioration of respiratory mechanics is indicated by a downward shift of the pressure-volume curve compared with controls. Na<sub>2</sub>S treatment prevents the deterioration of respiratory system compliance induced by HV<sub>T</sub> ventilation (40 ml/kg body weight). Pressure-volume curves are displayed as the mean of all curves in each experimental group. For clarity, only the mean values are displayed.

with a marked reduction of respiratory system compliance (table 1). Reduced respiratory system compliance was also reflected by a significant downward shift of the pressure-volume curves (fig. 2) measured in mice after HV<sub>T</sub> ventilation with and without H<sub>2</sub>S compared with those curves measured in mice not subjected to HV<sub>T</sub> ventilation.

### Effect of Inhaled H<sub>2</sub>S on Arterial Blood Gas Tensions during HV<sub>T</sub> Ventilation

In control mice, killed after 5 min of baseline ventilation (FIO<sub>2</sub> 0.4), the PaCO<sub>2</sub> was 40 ± 4 mmHg, and the PaO<sub>2</sub> was 239 ± 16 mmHg (fig. 3). After HV<sub>T</sub> ventilation (0 ppm



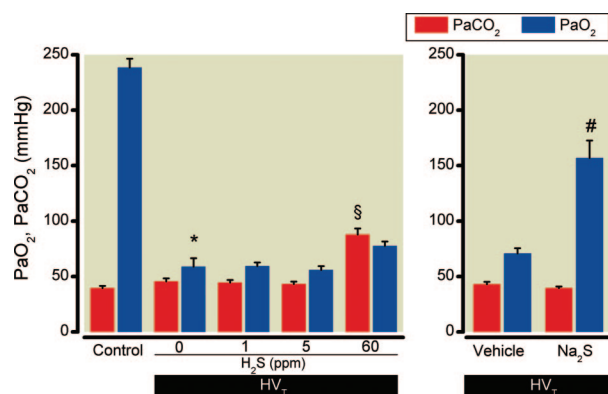

**Fig. 3.** Arterial oxygen (PaO<sub>2</sub>) and carbon dioxide (PaCO<sub>2</sub>) tensions of mice subjected to high tidal volume (HV<sub>T</sub>) ventilation (F<sub>IO<sub>2</sub></sub> 0.4) in the presence and absence of various concentrations of inhaled hydrogen sulfide (H<sub>2</sub>S) (n = 6 for each concentration) or after intravenous administration of sodium sulfide (Na<sub>2</sub>S) or vehicle (n = 8 in each group). Control mice were not subjected to HV<sub>T</sub> ventilation but were briefly ventilated at tidal volume 10 ml/kg and F<sub>IO<sub>2</sub></sub> 0.4 (n = 4). PaO<sub>2</sub> and PaCO<sub>2</sub> were measured in arterial blood obtained from the carotid artery. Arterial oxygenation was impaired by HV<sub>T</sub> ventilation, but the decrease in PaO<sub>2</sub> was attenuated by Na<sub>2</sub>S pretreatment. \* *P* < 0.0001 versus control, § *P* = 0.0001 versus 0 ppm H<sub>2</sub>S, # *P* = 0.0001 versus vehicle. F<sub>IO<sub>2</sub></sub> = inspired oxygen fraction.

H<sub>2</sub>S), PaCO<sub>2</sub> did not change, but PaO<sub>2</sub> decreased to 59 ± 17 mmHg at the end of the experiment. Similarly, in mice breathing 1 or 5 ppm H<sub>2</sub>S, PaCO<sub>2</sub> did not change but PaO<sub>2</sub> decreased to 60 ± 6 and 56 ± 8 mmHg, respectively. In contrast, in mice breathing 60 ppm H<sub>2</sub>S, PaCO<sub>2</sub> increased to 88 ± 13 mmHg (*P* = 0.0001 vs. 0 ppm) and PaO<sub>2</sub> decreased to 77 ± 10 mmHg (*P* = not significant vs. 0 ppm) in response to HV<sub>T</sub> ventilation.

#### Effect of Inhaled H<sub>2</sub>S on the Formation of Pulmonary Edema during HV<sub>T</sub> Ventilation

To investigate whether alveolar-capillary barrier disruption with pulmonary edema formation contributes to the observed impairment of arterial oxygenation, the protein concentration in BAL fluid was measured (fig. 4). BAL fluid protein concentrations were consistently higher in all mice subjected to HV<sub>T</sub> ventilation with and without inhaled H<sub>2</sub>S than in controls.

#### Effects of Inhaled H<sub>2</sub>S on BAL Fluid IL-6 and Leukocyte Concentrations during HV<sub>T</sub> Ventilation

To evaluate pulmonary inflammation, we measured the concentrations of the proinflammatory cytokine IL-6 and the concentration of leukocytes in BAL fluid (fig. 5). BAL fluid IL-6 concentrations were greater in mice subjected to HV<sub>T</sub> ventilation than in controls. In contrast, BAL fluid IL-6 concentrations were decreased in mice ventilated with 60 ppm H<sub>2</sub>S than without H<sub>2</sub>S (fig. 5A). BAL fluid leukocyte concentrations (fig. 5B) invariably were reduced by HV<sub>T</sub> ventilation in mice compared with controls, independent of whether the mice were ventilated with or without H<sub>2</sub>S.

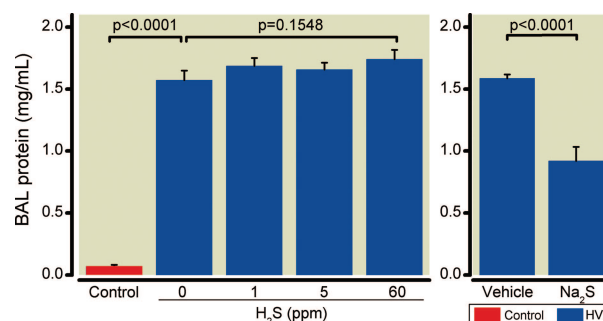

**Fig. 4.** Protein concentrations in bronchoalveolar lavage (BAL) fluid obtained from mice after high tidal volume (HV<sub>T</sub>) ventilation. BAL fluid protein concentrations were measured subsequent to HV<sub>T</sub> ventilation in the presence and absence of various concentrations of inhaled hydrogen sulfide (H<sub>2</sub>S) (n = 6 for each concentration) or after intravenous administration of sodium sulfide (Na<sub>2</sub>S) or vehicle (n = 8 in each group), and in control mice not subjected to HV<sub>T</sub> ventilation (n = 4).

#### Effects of Inhaled H<sub>2</sub>S on Pulmonary Expression of Leukocyte Chemoattractant and Adhesion Molecules during HV<sub>T</sub> Ventilation

The pulmonary messenger RNA (mRNA) concentrations of CXCL-2, CD11b, and L-selectin in mice subjected to HV<sub>T</sub> ventilation were approximately 7-, 3-, and 1.5-fold greater than in controls (fig. 6). Inhalation of 60 ppm H<sub>2</sub>S during HV<sub>T</sub> ventilation augmented the increase in CXCL-2, CD11b, and

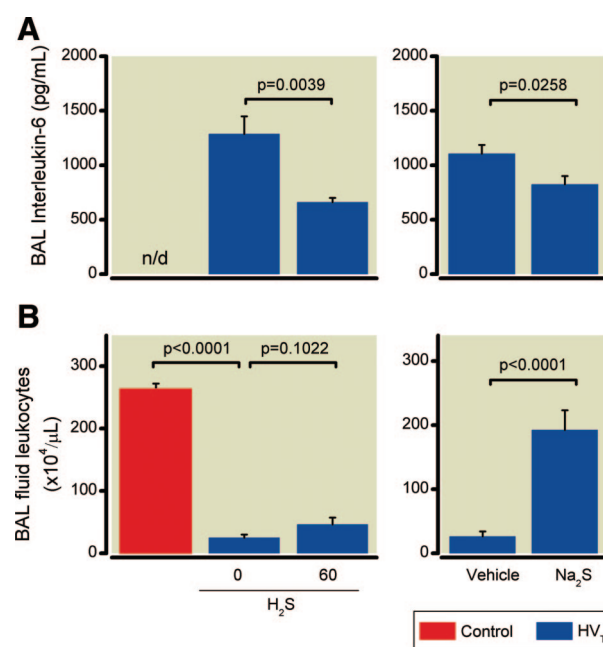

**Fig. 5.** Concentrations of interleukin-6 (IL-6) (A) and leukocytes in bronchoalveolar lavage (BAL) fluid (B) obtained from mice after high tidal volume (HV<sub>T</sub>) ventilation. IL-6 and leukocyte concentrations were measured subsequent to HV<sub>T</sub> ventilation in the presence and absence of inhaled hydrogen sulfide (H<sub>2</sub>S) (n = 6 for each concentration) or after intravenous administration of sodium sulfide (Na<sub>2</sub>S) or vehicle (n = 8 in each group), and in control mice not subjected to HV<sub>T</sub> ventilation (n = 4). n/d = not detectable.

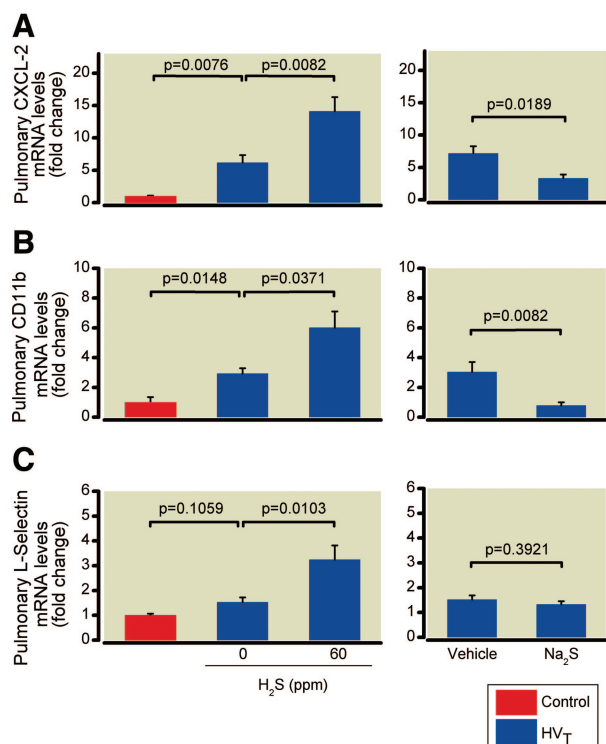

**Fig. 6.** Pulmonary messenger RNA (mRNA) concentrations of CXCL-2 (A), CD11b (B), and L-selectin (C) in mice subjected to high tidal volume (HV<sub>T</sub>) ventilation in the presence and absence of hydrogen sulfide (H<sub>2</sub>S) (n = 6 for each concentration) or after intravascular administration of sodium sulfide (Na<sub>2</sub>S) or vehicle (n = 8 in each group). mRNA concentrations are expressed as fold change relative to the average expression values in control mice not subjected to HV<sub>T</sub> ventilation (n = 4).

L-selectin mRNA concentrations (15-, 6-, and 3-increase *vs.* controls).

#### Effects of Inhaled H<sub>2</sub>S on Oxidative Stress and Pulmonary Expression of Antioxidant Genes

The concentration of total glutathione and the ratio of reduced to oxidized glutathione (GSH/GSSG) were significantly lower in lungs subjected to HV<sub>T</sub> ventilation than in controls (fig. 7). This decrease was independent of whether mice were ventilated with or without H<sub>2</sub>S.

The pulmonary mRNA concentrations of NQO1 and GPX2 in mice subjected to HV<sub>T</sub> ventilation were approximately 1.6- (not significant) and 2-fold higher than in controls (fig. 8). Inhalation of 60 ppm H<sub>2</sub>S during HV<sub>T</sub> ventilation attenuated the increase in NQO1 and GPX2 mRNA concentrations (1.1- and 1.3-fold increase *vs.* controls). HV<sub>T</sub> ventilation with 0 or 60 ppm H<sub>2</sub>S reduced the pulmonary mRNA concentrations of GST-A4 to 66% and 54%, respectively, of the concentrations measured in control mice.

#### Effect of Na<sub>2</sub>S on Respiratory Mechanics during HV<sub>T</sub> Ventilation

In vehicle-treated animals, PIP and respiratory system compliance deteriorated to the same extent as in mice receiving

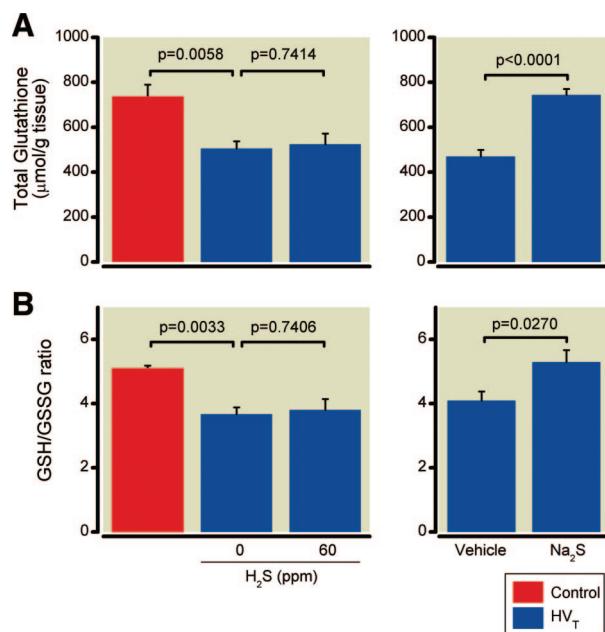

**Fig. 7.** Total glutathione concentrations (A) and the ratio of reduced to oxidized glutathione (GSH/GSSG) (B) in lung tissues of mice after high tidal volume (HV<sub>T</sub>) ventilation in the presence and absence of inhaled hydrogen sulfide (H<sub>2</sub>S) (n = 6 for each concentration) or after intravascular administration of sodium sulfide (Na<sub>2</sub>S) or vehicle (n = 8 in each group) and in control mice not subjected to HV<sub>T</sub> ventilation (n = 4).

HV<sub>T</sub> ventilation alone (table 1). In contrast, treatment with Na<sub>2</sub>S attenuated the PIP increase, preserved respiratory system compliance, and reduced the downward shift of the pressure-volume curve (fig. 2).

#### Effect of Na<sub>2</sub>S on Arterial Blood Gas Tensions during HV<sub>T</sub> Ventilation

In vehicle-treated animals, PaCO<sub>2</sub> was stable and PaO<sub>2</sub> decreased after HV<sub>T</sub> ventilation (fig. 3). Compared with vehicle-treatment, Na<sub>2</sub>S treatment attenuated the decrease in PaO<sub>2</sub> in mice subjected to HV<sub>T</sub> ventilation. At the end of the experiment, PaO<sub>2</sub> was higher in Na<sub>2</sub>S-treated animals than in vehicle-treated animals (157 ± 45 *vs.* 71 ± 14 mmHg, *P* = 0.0001).

#### Effect of Na<sub>2</sub>S on the Formation of Pulmonary Edema during HV<sub>T</sub> Ventilation

BAL fluid protein concentrations were greater in vehicle-treated mice subjected to HV<sub>T</sub> ventilation than in controls (fig. 4). In contrast, BAL fluid protein concentrations were lower in Na<sub>2</sub>S-treated mice than in vehicle-treated mice.

#### Effects of Na<sub>2</sub>S on BAL Fluid IL-6 and Leukocyte Concentrations during HV<sub>T</sub> Ventilation

BAL fluid IL-6 concentrations were greater in vehicle-treated animals subjected to HV<sub>T</sub> ventilation than in controls. Na<sub>2</sub>S

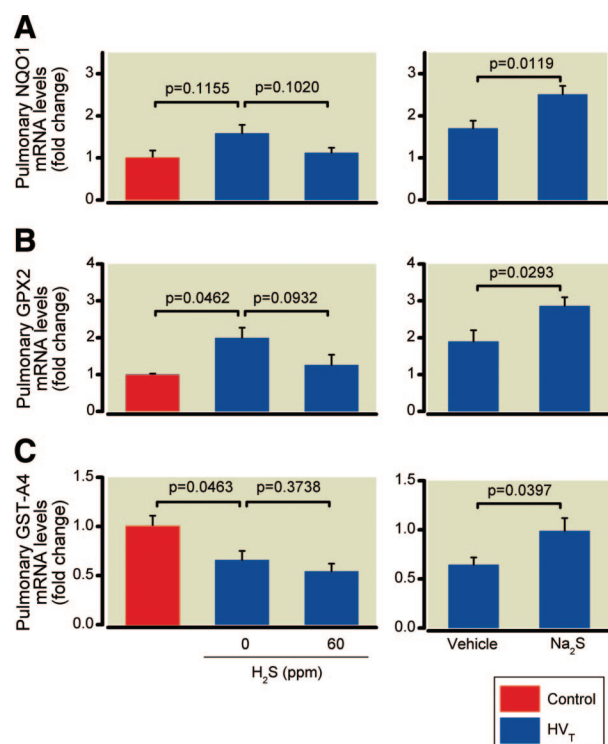

**Fig. 8.** Pulmonary messenger RNA (mRNA) concentrations of the Nrf2-dependent antioxidant genes NAD(P)H:quinone oxidoreductase, NQO1 (A), glutathione peroxidase 2, GPX2 (B), and glutathione-S-transferase A4, GST-A4 (C) in mice subjected to high tidal volume (HV<sub>T</sub>) ventilation in the presence and absence of hydrogen sulfide (H<sub>2</sub>S) (n = 6 for each concentration) or after intravenous administration of sodium sulfide (Na<sub>2</sub>S) or vehicle (n = 8 in each group). mRNA concentrations are expressed as fold change relative to the average expression values in control mice not subjected to HV<sub>T</sub> ventilation (n = 4).

treatment reduced BAL fluid IL-6 concentrations in mice subjected to HV<sub>T</sub> ventilation (fig. 5A).

High tidal volume ventilation reduced the leukocyte concentration in BAL fluid obtained from vehicle-treated mice compared with that from controls. In contrast, Na<sub>2</sub>S treatment restored the concentration of leukocytes in BAL fluid of mice subjected to HV<sub>T</sub> ventilation (fig. 5B).

#### Effects of Na<sub>2</sub>S on Pulmonary Expression of Leukocyte Chemoattractant and Adhesion Molecules during HV<sub>T</sub> Ventilation

The CXCL-2 and CD11b mRNA concentrations measured in the lungs of vehicle-treated animals subjected to HV<sub>T</sub> ventilation (7- and 3-fold increase *vs.* controls) were significantly attenuated by Na<sub>2</sub>S treatment (3- and 0.8-fold increase *vs.* controls, fig. 6, A and B). In contrast, the pulmonary mRNA concentrations of L-selectin measured in vehicle-treated animals (1.5-fold increase *vs.* controls) did not differ from those measured in Na<sub>2</sub>S-treated animals (1.3-fold increase *vs.* controls, fig. 6C).

#### Effects of Na<sub>2</sub>S on Oxidative Stress and Pulmonary Expression of Antioxidant Genes

Total glutathione concentrations and the GSH/GSSG in lung tissues obtained from mice subjected to HV<sub>T</sub> ventilation were significantly higher in Na<sub>2</sub>S-treated animals than in vehicle-treated animals (fig. 7). The increase of antioxidant NQO1 and GPX2 mRNA concentrations measured in the lungs of vehicle-treated animals subjected to HV<sub>T</sub> ventilation (1.7- and 1.9-fold increase *vs.* controls) was significantly enhanced by Na<sub>2</sub>S treatment (2.5- and 2.9-fold increase *vs.* controls, fig. 8). Moreover, Na<sub>2</sub>S treatment prevented the reduction of GST-A4 mRNA concentrations measured in vehicle-treated animals subjected to HV<sub>T</sub> ventilation.

#### Pulmonary Histopathologic Changes from HV<sub>T</sub> Ventilation

Histologic analysis of lung sections from mice treated with either 60 ppm inhaled H<sub>2</sub>S or with injection of Na<sub>2</sub>S revealed that HV<sub>T</sub> ventilation induced signs of edema formation and airway epithelial disruption (fig. 9). These pathologic signs were similar in mice ventilated with or without 60 ppm H<sub>2</sub>S. Fewer signs of edema and epithelial disruption were observed after Na<sub>2</sub>S pretreatment. The number of neutrophils in lung tissue sections taken from three mice subjected to HV<sub>T</sub> ventilation was found to be greater than the number of lung tissue neutrophils determined in two control animals not subjected to HV<sub>T</sub> ventilation (fig. 10). In addition, the numbers of lung tissue neutrophils found after HV<sub>T</sub> ventilation in three mice with and three mice without inhalation of 60 ppm H<sub>2</sub>S were similar. In contrast, the number of neutrophils found in lung tissue sections taken from three mice subjected to HV<sub>T</sub> ventilation after Na<sub>2</sub>S pretreatment was smaller. Despite the small sample size of tissue sections used for neutrophil staining, the variance of lung tissue neutrophil concentrations is small. The interpretation of these data must be made with great caution.

Additional figures describing the effect of various concentrations of inhaled H<sub>2</sub>S on BAL fluid leukocyte and IL-6 concentrations, pulmonary expression of leukocyte chemoattractant and adhesion molecules, and oxidative stress parameters and antioxidant gene expression are provided in Supplemental Digital Content 2, <http://links.lww.com/ALN/A776>, figures 1–4.

#### Discussion

This study was performed to evaluate whether inhalation of H<sub>2</sub>S gas protects against lung injury from HV<sub>T</sub> ventilation in mice. We found that inhalation of 1 or 5 ppm H<sub>2</sub>S produces neither beneficial nor deleterious effects, whereas inhalation of 60 ppm H<sub>2</sub>S accelerates the development of lung injury and death from HV<sub>T</sub> ventilation. In contrast, treatment with a bolus infusion of Na<sub>2</sub>S attenuates pulmonary edema formation, thereby limiting the deterioration of respiratory system compliance and arterial oxygenation. Our results suggest that these protective effects of Na<sub>2</sub>S in VILI are linked to attenuated expression of chemoattractant and leukocyte ad-



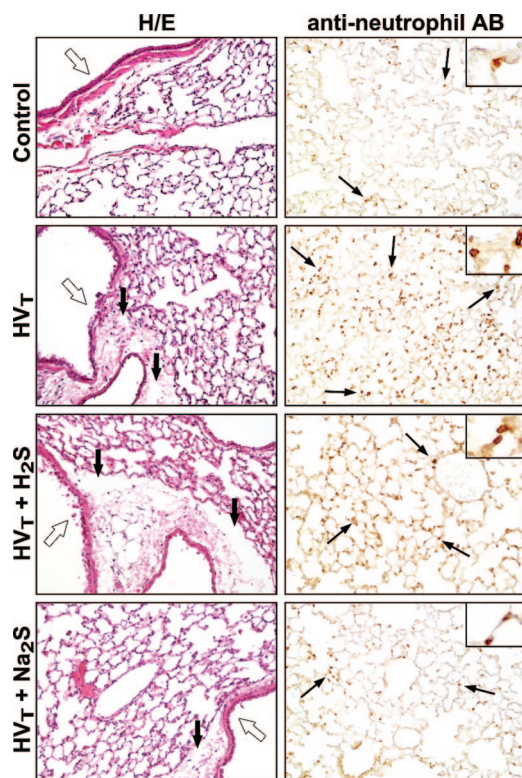

**Fig. 9.** Representative lung sections of mice subjected to high tidal volume ( $HV_T$ ) ventilation in the presence and absence of 60 ppm hydrogen sulfide ( $H_2S$ ) or after intravenous administration of sodium sulfide ( $Na_2S$ ). These sections were stained with hematoxylin and eosin (H/E) or reacted with antibodies (AB) against neutrophils (*inset*: higher magnification) and were compared with sections from nonventilated control mice. In control mice, the airway epithelium (*open arrows*) is intact, no edema surrounding the airway is seen, and few neutrophils are visible (*thin black arrows*).  $HV_T$  ventilation induces airway disruption, edema formation between airways and adjacent vessels (*thick black arrows*), and neutrophil infiltration. Similar pathologic changes were present in lungs subjected to  $HV_T$  ventilation in the presence of 60 ppm  $H_2S$ . Less epithelial disruption and edema and fewer neutrophils are seen in lung tissue sections after  $Na_2S$  pretreatment.

hesion molecules, enhanced expression of Nrf2-dependent antioxidant genes, and improved availability of reduced glutathione in the lung.

Our findings underscore the potential toxicity of  $H_2S$  gas inhalation in a rodent model of VILI. Lopez *et al.* reported cytotoxic effects and edema formation in respiratory tract tissues of rats breathing 10–400 ppm  $H_2S$ .<sup>17</sup> The primary biochemical mechanism responsible for the toxicity of  $H_2S$  gas is believed to involve the inhibition of cytochrome c oxidase.<sup>18</sup> Inhibition of cytochrome c oxidase blocks oxidative phosphorylation, a major source of cellular adenosine triphosphate synthesis. In turn, the abolishment of oxidative phosphorylation implies functional hypoxia (inability to use available oxygen for oxidative metabolism).<sup>18</sup> Both hypoxia and a lack of adenosine triphosphate are associated with pulmonary vasoconstriction, impaired alveolar fluid clearance,

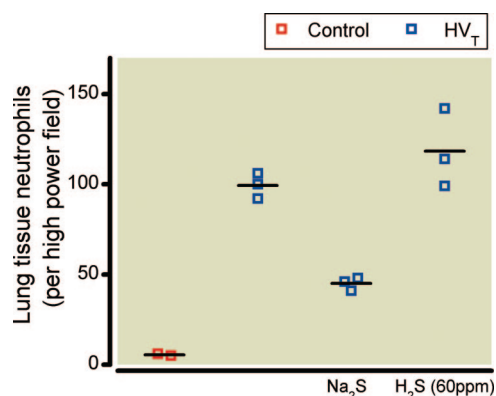

**Fig. 10.** Pulmonary infiltration with neutrophils in mice subjected to high tidal volume ( $HV_T$ ) ventilation in the presence and absence of inhaled hydrogen sulfide ( $H_2S$ ) (60 ppm) or after intravenous administration of sodium sulfide ( $Na_2S$ ) ( $n = 3$  in each group). Lung tissue sections were reacted with antibodies against neutrophils and were compared with lung sections obtained from control mice not subjected to  $HV_T$  ventilation ( $n = 2$ ). Representative examples of lung sections are displayed in figure 9. Neutrophil concentrations are reported as the number of neutrophils per high power field (magnification  $\times 40$ ).

and pulmonary edema (reviewed in Bartsch *et al.*<sup>19</sup>). Based on these considerations, the inhalation of 60 ppm  $H_2S$  is likely to have contributed to the formation of pulmonary edema in our murine model.

Faller *et al.* reported that inhalation of 80 ppm  $H_2S$  limited cytokine release in a model of lung injury in C57BL/6 mice caused by ventilation with a moderate tidal volume (12 ml/kg). Similarly, we found that BAL fluid IL-6 concentrations were lower when mice developed lung injury in the presence of 60 ppm  $H_2S$  (fig. 5). However, the current study demonstrates that under conditions of higher mechanical lung stretch (peak airway pressure 35 cm  $H_2O$ , as opposed to  $\sim 12$  cm  $H_2O$  in the Faller *et al.* study), the potential anti-inflammatory effects of inhaled  $H_2S$  are outweighed by the deleterious effects of inhaling 60 ppm  $H_2S$ , including enhanced pulmonary expression of chemoattractant and leukocyte adhesion molecules and earlier deaths (figs. 1 and 6). In addition,  $H_2S$  inhalation prevented the up-regulation of antioxidant gene expression in mice subjected to  $HV_T$  ventilation (fig. 8) and caused a decrease in both the GSH/GSSG and total glutathione concentrations in the lung (fig. 7).

Mechanical stretching of the lung may initiate intravascular pulmonary leukocyte sequestration in mice.<sup>20</sup> Various chemoattractant and adhesion molecules that are derived from epithelial and endothelial cells, as well as alveolar macrophages and fibroblasts, are responsible for inflammatory recruitment and migration of leukocytes from the circulation into injured lung tissue.<sup>21</sup> In particular, the neutrophil chemoattractant CXCL-2 and the adhesion molecules CD11b and L-selectin are reported to play a critical role in the pathogenesis of VILI and for control of leukocyte trafficking into the lung.<sup>22,23</sup> Ultimately, pulmonary neutrophil activation



and accumulation promotes microvascular permeability and edema formation.<sup>3,22</sup> Our results demonstrate that HV<sub>T</sub> ventilation increases the pulmonary expression of CXCL-2, CD11b, and L-selectin. Moreover, the HV<sub>T</sub>-induced increase in CXCL-2, CD11b, and L-selectin was enhanced markedly by concomitant inhalation of 60 ppm H<sub>2</sub>S (fig. 7). These findings suggest that the pathophysiologic changes leading to an earlier death in mice ventilated with 60 ppm H<sub>2</sub>S appear to be linked to enhanced expression of chemoattractant and leukocyte adhesion molecules in the lung.

As an alternative to the inhalation of potentially toxic H<sub>2</sub>S gas, we examined whether intravascular administration of Na<sub>2</sub>S can attenuate the development of VILI during HV<sub>T</sub> ventilation. We found that systemic treatment with Na<sub>2</sub>S protects against VILI and reduces GSH/GSSG imbalances (fig. 7) in mice subjected to HV<sub>T</sub> ventilation. Our results also suggest that Na<sub>2</sub>S attenuates the pulmonary expression of CXCL-2 and CD11b during VILI (fig. 6). This finding is supported by other reports demonstrating that both Na<sub>2</sub>S and sodium hydrogen sulfide can impair leukocyte adherence to endothelium and subsequent diapedesis during inflammation *in vivo* by reducing the expression of endothelial and leukocyte adhesion molecules.<sup>24,25</sup> Increased pulmonary leukocyte adhesion in mice subjected to HV<sub>T</sub> ventilation may also account for the low concentrations of BAL leukocytes reported here (fig. 5B) and elsewhere.<sup>26</sup> The protective effect of Na<sub>2</sub>S in this model of lung injury produced by HV<sub>T</sub> ventilation is consistent with the beneficial effect of sodium hydrogen sulfide in other rodent models of lung injury induced by oleic acid<sup>27</sup> or a skin burn and smoke inhalation.<sup>28</sup>

The current study demonstrates that Na<sub>2</sub>S pretreatment, but not H<sub>2</sub>S inhalation during HV<sub>T</sub> ventilation, enhances the pulmonary expression of Nrf2-dependent antioxidant genes and stabilizes the concentration of reduced glutathione in the lung (fig. 6). A transcription factor for several antioxidant genes, Nrf2 is a master regulator of antioxidant response mechanisms (reviewed in Maher and Yamamoto<sup>29</sup>). Activation of Nrf2 results in the induction of many cytoprotective proteins. In the lung, Nrf2-dependent genes regulate the cellular redox status and have been reported to modulate pulmonary cellular responses and oxidative stress induced by mechanical ventilation.<sup>5</sup> The reasons inhaled H<sub>2</sub>S and intravenous Na<sub>2</sub>S have distinct effects in VILI in the current study are likely to be multifactorial. It is possible that pretreatment with Na<sub>2</sub>S before injurious ventilation is required to induce the Nrf2-dependent antioxidant defense mechanisms that contribute to protecting against VILI. It is also conceivable that intravascular administration of Na<sub>2</sub>S may preferentially target activation of Nrf2-dependent signaling in different cell types compared with inhaled H<sub>2</sub>S (*e.g.*, activating vascular endothelial *vs.* airway epithelial cells). Analyzing the candidate cellular and molecular targets of H<sub>2</sub>S and Na<sub>2</sub>S in future studies may provide additional insights into their differential biologic effects.

## Limitations

In patients, ventilator-associated lung injury usually occurs in lungs with reduced compliance caused by preexisting conditions (two-hit or multifactorial lung injury), including septic inflammation. The current study uses a one-hit model of VILI in healthy mouse lungs. Thus, the current study has limited clinical relevance. Although the current study demonstrates that Na<sub>2</sub>S pretreatment protects against VILI, this study does not elucidate the potential dose-dependency of this protective effect and does not investigate the potential toxicity of Na<sub>2</sub>S to central or peripheral organs. Lung tissue H<sub>2</sub>S concentrations were not measured in this study. Comparing the lung tissue concentrations of sulfide species in future studies may help explain the differential biologic effects of inhaled H<sub>2</sub>S and intravascular Na<sub>2</sub>S and their dose-dependency.

## Summary

Our study demonstrates that continuous inhalation of H<sub>2</sub>S gas enhances the expression of leukocyte adhesion and chemoattractant molecules (CXCL-2, CD11b, and L-selectin), accelerates pulmonary edema formation, and promotes lung injury when it is inhaled at high concentrations (60 ppm) during mechanical ventilation with a high tidal volume. The deleterious effects of H<sub>2</sub>S gas inhalation reemphasize that H<sub>2</sub>S can cause pulmonary toxicity and do not suggest a substantial role for H<sub>2</sub>S in the prevention and treatment of VILI in patients. In contrast, our data suggest that systemic intravascular treatment with Na<sub>2</sub>S may represent a novel therapeutic strategy to prevent both VILI and GSH/GSSG imbalance by activating Nrf2-dependent antioxidant gene transcription.

The authors thank their collaborators from the Department of Anesthesia, Critical Care and Pain Medicine, Massachusetts General Hospital and Harvard Medical School, Boston, Massachusetts: Rosemary C. Jones, Ph.D. (Associate Professor of Pathology), and Diane E. Capen and Yuko Beppu (Research Assistants) for their skillful assistance and advice in the preparation and interpretation of histologic lung sections, and Andrea U. Steinbicker, M.D., M.P.H., Matthias Derwall, M.D., and Kentaro Tokuda, M.D. (Research Fellows), for advice and technical assistance in quantitative real-time PCR techniques. The authors also thank Yasuko Nagasaka, M.D., Ph.D. (Instructor), for multifaceted advice and assistance with the study.

## References

1. Ventilation with lower tidal volumes as compared with traditional tidal volumes for acute lung injury and the acute respiratory distress syndrome. The Acute Respiratory Distress Syndrome Network. *N Engl J Med* 2000; 342:1301–8
2. Brower RG, Lanken PN, MacIntyre N, Matthay MA, Morris A, Ancukiewicz M, Schoenfeld D, Thompson BT, National Heart, Lung, and Blood Institute ARDS Clinical Trials Network: Higher *versus* lower positive end-expiratory pressures in patients with the acute respiratory distress syndrome. *N Engl J Med* 2004; 351:327–36
3. Lionetti V, Recchia FA, Ranieri VM: Overview of ventilator-induced lung injury mechanisms. *Curr Opin Crit Care* 2005; 11:82–6
4. Birukov KG: Cyclic stretch, reactive oxygen species, and vascular remodeling. *Antioxid Redox Signal* 2009; 11:1651–67

5. Papaiahgari S, Yerrapureddy A, Reddy SR, Reddy NM, Dodd-O JM, Crow MT, Grigoryev DN, Barnes K, Tudor RM, Yamamoto M, Kensler TW, Biswal S, Mitzner W, Hassoun PM, Reddy SP: Genetic and pharmacologic evidence links oxidative stress to ventilator-induced lung injury in mice. *Am J Respir Crit Care Med* 2007; 176:1222-35
6. Vaporidi K, Francis RC, Bloch KD, Zapol WM: Nitric oxide synthase 3 contributes to ventilator-induced lung injury. *Am J Physiol Lung Cell Mol Physiol* 2010; 299:L150-9
7. Belperio JA, Keane MP, Lynch JP 3rd, Strieter RM: The role of cytokines during the pathogenesis of ventilator-associated and ventilator-induced lung injury. *Semin Respir Crit Care Med* 2006; 27:350-64
8. Gurkan OU, O'Donnell C, Brower R, Ruckdeschel E, Becker PM: Differential effects of mechanical ventilatory strategy on lung injury and systemic organ inflammation in mice. *Am J Physiol Lung Cell Mol Physiol* 2003; 285:L710-8
9. Slutsky AS, Tremblay LN: Multiple system organ failure: Is mechanical ventilation a contributing factor? *Am J Respir Crit Care Med* 1998; 157:1721-5
10. Szabó C: Hydrogen sulphide and its therapeutic potential. *Nat Rev Drug Discov* 2007; 6:917-35
11. Baumgart K, Radermacher P, Wagner F: Applying gases for microcirculatory and cellular oxygenation in sepsis: Effects of nitric oxide, carbon monoxide, and hydrogen sulfide. *Curr Opin Anaesthesiol* 2009; 22:168-76
12. Jha S, Calvert JW, Duranski MR, Ramachandran A, Lefer DJ: Hydrogen sulfide attenuates hepatic ischemia-reperfusion injury: Role of antioxidant and antiapoptotic signaling. *Am J Physiol Heart Circ Physiol* 2008; 295:H801-6
13. Kimura Y, Kimura H: Hydrogen sulfide protects neurons from oxidative stress. *Faseb J* 2004; 18:1165-7
14. Calvert JW, Jha S, Gundewar S, Elrod JW, Ramachandran A, Pattillo CB, Kevil CG, Lefer DJ: Hydrogen sulfide mediates cardioprotection through Nrf2 signaling. *Circ Res* 2009; 105:365-74
15. Milby TH, Baselt RC: Hydrogen sulfide poisoning: Clarification of some controversial issues. *Am J Ind Med* 1999; 35:192-5
16. Faller S, Ryter SW, Choi AM, Loop T, Schmidt R, Hoetzel A: Inhaled hydrogen sulfide protects against ventilator-induced lung injury. *ANESTHESIOLOGY* 2010; 113:104-15
17. Lopez A, Prior M, Yong S, Albassam M, Lillie LE: Biochemical and cytologic alterations in the respiratory tract of rats exposed for 4 hours to hydrogen sulfide. *Fundam Appl Toxicol* 1987; 9:753-62
18. Khan AA, Schuler MM, Prior MG, Yong S, Coppock RW, Florence LZ, Lillie LE: Effects of hydrogen sulfide exposure on lung mitochondrial respiratory chain enzymes in rats. *Toxicol Appl Pharmacol* 1990; 103:482-90
19. Bärtsch P, Mairbäurl H, Maggiorini M, Swenson ER: Physiological aspects of high-altitude pulmonary edema. *J Appl Physiol* 2005; 98:1101-10
20. Choudhury S, Wilson MR, Goddard ME, O'Dea KP, Takata M: Mechanisms of early pulmonary neutrophil sequestration in ventilator-induced lung injury in mice. *Am J Physiol Lung Cell Mol Physiol* 2004; 287:L902-10
21. Jafari B, Ouyang B, Li LF, Hales CA, Quinn DA: Intracellular glutathione in stretch-induced cytokine release from alveolar type-2 like cells. *Respirology* 2004; 9:43-53
22. Belperio JA, Keane MP, Burdick MD, Londhe V, Xue YY, Li K, Phillips RJ, Strieter RM: Critical role for CXCR2 and CXCR2 ligands during the pathogenesis of ventilator-induced lung injury. *J Clin Invest* 2002; 110:1703-16
23. Doerschuk CM: Leukocyte trafficking in alveoli and airway passages. *Respir Res* 2000; 1:136-40
24. Fiorucci S, Antonelli E, Distrutti E, Rizzo G, Mencarelli A, Orlandi S, Zanardo R, Renga B, Di Sante M, Morelli A, Cirino G, Wallace JL: Inhibition of hydrogen sulfide generation contributes to gastric injury caused by anti-inflammatory nonsteroidal drugs. *Gastroenterology* 2005; 129:1210-24
25. Zanardo RC, Brancialeone V, Distrutti E, Fiorucci S, Cirino G, Wallace JL: Hydrogen sulfide is an endogenous modulator of leukocyte-mediated inflammation. *Faseb J* 2006; 20:2118-20
26. Frank JA, Wray CM, McAuley DF, Schwendener R, Matthay MA: Alveolar macrophages contribute to alveolar barrier dysfunction in ventilator-induced lung injury. *Am J Physiol Lung Cell Mol Physiol* 2006; 291:L1191-8
27. Li T, Zhao B, Wang C, Wang H, Liu Z, Li W, Jin H, Tang C, Du J: Regulatory effects of hydrogen sulfide on IL-6, IL-8 and IL-10 levels in the plasma and pulmonary tissue of rats with acute lung injury. *Exp Biol Med (Maywood)* 2008; 233:1081-7
28. Esechie A, Kiss L, Olah G, Horváth EM, Hawkins H, Szabo C, Traber DL: Protective effect of hydrogen sulfide in a murine model of acute lung injury induced by combined burn and smoke inhalation. *Clin Sci (Lond)* 2008; 115:91-7
29. Maher J, Yamamoto M: The rise of antioxidant signaling-the evolution and hormetic actions of Nrf2. *Toxicol Appl Pharmacol* 2010; 244:4-15
